# Supplementary material
Source: PubMed Central journal article supplement (PMC5097466)

**Supplemental Figure A. Observed five-year risk of atherosclerotic cardiovascular events within predicted risk category in eligible 40 to 75 year old adults who received statin therapy for primary prevention, stratified by diabetes status.**

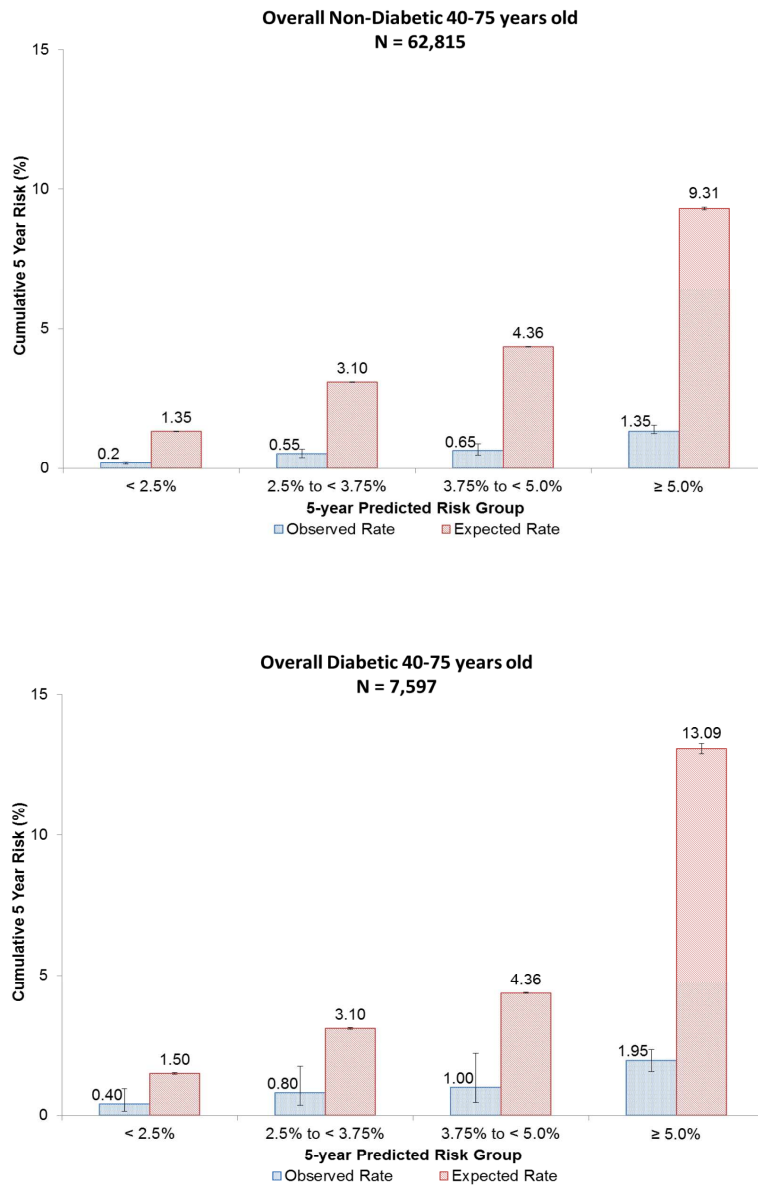

Supplemental Figure B. Calibration plots comparing observed five-year risk of atherosclerotic cardiovascular events within predicted risk category in eligible 40 to 75 year old adults who received Statins for primary prevention by diabetes status.

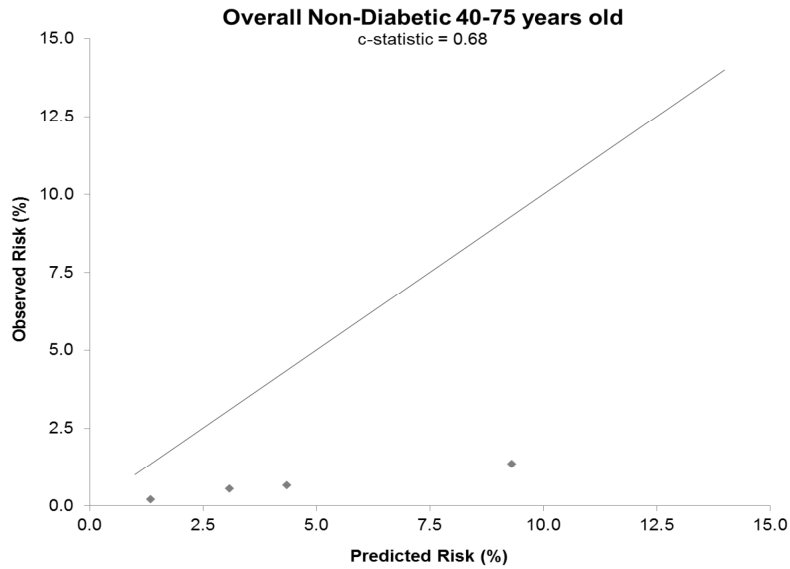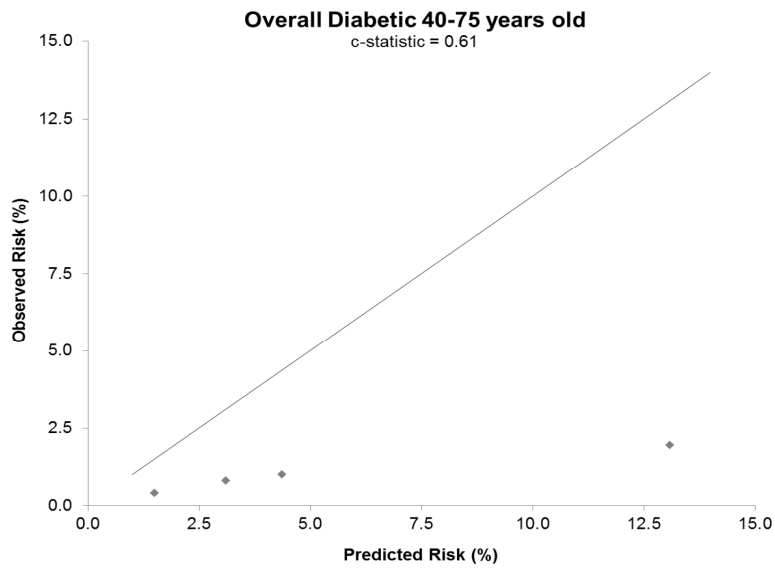

Supplement: NIHMS767757-supplement-supplement_1.pdf [file NIHMS767757-supplement-supplement_1.pdf]
